# Supplementary material for: PSA-NCAM positive neural progenitors stably expressing BDNF promote functional recovery in a mouse model of spinal cord injury
Source: PubMed Central journal article supplement (PMC4712602; doi:10.1186/s13287-015-0268-x), 2016-01-13
Supplement: 13287_2015_268_MOESM1_ESM.pdf [file 13287_2015_268_MOESM1_ESM.pdf]

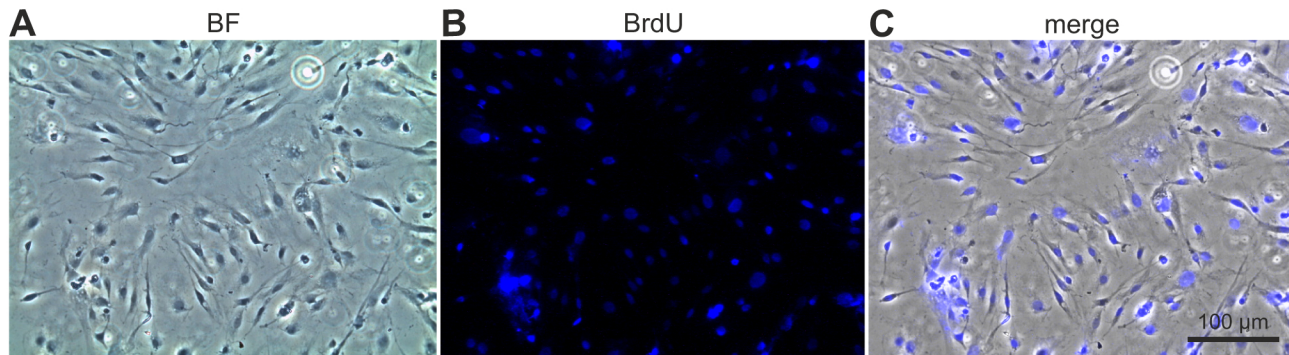

**Figure S1**
